# Supplementary material for: Transcripts Expressed during Germination Sensu Stricto Are Associated with Vigor in Soybean Seeds
Source: MDPI journal article supplement (doi:10.3390/plants11101310), 2022-05-14
Supplement: s1 [file s1]

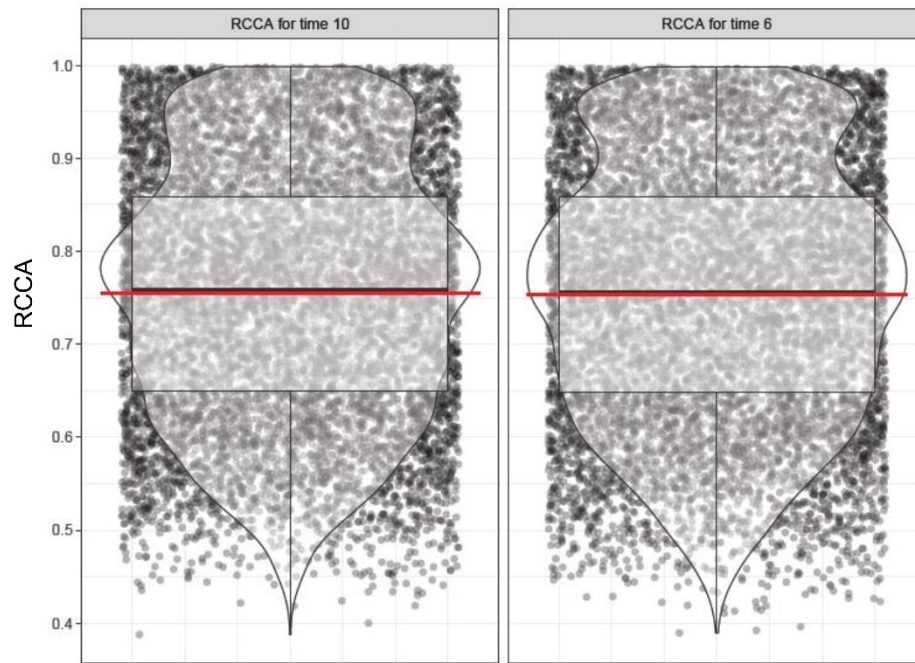

Supplementary figure S1. First eigenvalue of the regulatory canonical correlation (RCCA) from the Bootstrap 10,000 of gene expression at 6 and 10h during germination *sensu stricto* and vigor properties. The red line indicates the average value of the correlation.
