# Supplementary material for: Transcripts Expressed during Germination Sensu Stricto Are Associated with Vigor in Soybean Seeds
Source: Plants (Basel). 2022 May 14;11(10):1310. doi: 10.3390/plants11101310 (PMC9147077; doi:10.3390/plants11101310)
Supplement: Supplementary file 1 [file plants-11-01310-s001.zip › Table S1. Genes (mRNAs) studied in the embryonic axis of soybean seeds during germination sensu stricto and primers used for real-time PCR reactions-1.xlsx]

## Sheet: Planilha1
Gene	Putative function/process	Locus Arabidopsis	Locus Glycine max	Forward (5’–3’)	Reverse (3’–5’)
Importin beta-2 subunit family protein	Reference	AT2G16950	Glyma.20G106300	GATAATAAGCGGGTCCAAGAG	GTCATCAGGTGCTTCAGTATAA
20S proteasome subunit beta 1	Reference	AT4G31300	Glyma.06G078500	CACCAACACACGATACAACT	TCCCAACCACCAACAATTAACC
N-glycosylase/DNA lyase OGG1	DNA repair	AT1G21710	Glyma.06G115500	GTGCTCTTCTAATAACAACATCGG	AAAGCGTGGAACTGAAACTC
DNA-(apurinic or apyrimidinic site) lyase	DNA repair	AT2G41460	Glyma.02G191100	CTACCACTTCTGTCAATCTCAC	CATTGCTTTCACAGTTGGAC
NAC domain-containing protein 8-like	DNA repair	AT1G25580	Glyma.01G088200	GCAATCAACGCTTACAACAC	TTTGAATCCCATTAAAGACAACTG
Metallothionein-like protein 1	Oxidative stress	AT3G09390	Glyma.17G230500	GACTTGAGTTACGTTGAGAAGAC	CAGATGCAACACCCATTTCAG
Enolase	Glycolysis	AT2G36530	Glyma.03G190500	GAGTTTATGGTTCTTCCCGTG	CCTTCGTCACCAACATTTACTG
Thiol protease aleurain-like	Protein metabolism	AT3G45310	Glyma.17G049000	CGACACAGAAGAAGCATATCC	GTTTCAATTCATCCTCAGCACC
Cysteine proteinase RD21a-like	Protein metabolism	AT1G47128	Glyma.14G085800	GTCCAAATCCACCTAATCCTG	CTCAAAGCAAGCATTTCCGA
Expansin-A10-like	Cell wall loosening; cell expansion	AT1G69530	Glyma.01G050100	TTCGCATTGCACAATACAGAG	TTATGAGGACCAAGTTAAAGTAGG
Expansin-A6	Cell wall loosening; cell expansion	AT2G37640	Glyma.07G132600	GTGATGCTTCTGGAACAATGG	ATCCTGGTCGCACTTTATCTC
Expansin-like A1	Cell wall loosening; cell expansion	AT3G45970	Glyma.11G096700	GAAGAATCAAGCAAGAAGCCT	TCCAGTTTGAAGACCCAACC
Alpha-xylosidase 1-like	Cell wall loosening; cell expansion	AT1G68560	Glyma.01G081300	GCTATTCAACCTATGTTGATCTCC	CTGCTCCACTTCCTTCTAATCC
Tubulin alpha-4 chain-like	Cell wall loosening; cell expansion	AT1G04820	Glyma.20G136000	CACCTACACCAACCTCAACC	ATTCAGTCACATCCACATTCAG
Xyloglucan endotransglucosylase/hydrolase 2	Cell wall loosening; cell expansion	AT3G23730	Glyma.05G150400	CACCCTTTACAGCATACTACC	TATAAGAATCAAGCTCATTTGCCT
Xyloglucan endotransglucosylase/hydrolase 22	Cell wall loosening; cell expansion	AT5G57560	Glyma.13G094900	GTTCCCTTCCCAAAGAATCAG	ATCTGTCTTCACAAGTCCACC
Endoglucanase 8-like	Cell wall loosening; cell expansion	AT1G70710	Glyma.08G043600	CTACCCGCAGAGAATACACC	GGCTAAAGTAATACCGAGATCCAG
Pectinesterase 3	Cell wall loosening; cell expansion	AT1G53840	Glyma.16G014000	AAACAATCTCACAGCTCCCA	GCTTCAAGAATGACCCAATATCAG
LRR receptor-like serine/threonine-protein kinase FEI	Cell wall loosening; cell expansion	AT1G31420	Glyma.09G215700	TTTACTTGATGGAAACTTGGAGG	TCTGCCACTTTGCATATACTC
Beta-1,3-galactosyltransferase 20	Cell wall loosening; cell expansion	AT4G21060	Glyma.15G091500	GAGTTCTTTCTGCCTCAAATCAC	GCACCACATTTACTTCCTTCC
65-kDa microtubule-associated protein 1	Cell wall loosening; cell expansion	AT5G55230	Glyma.14G018300	CTTGGATGTGTACAAGAGAAAGG	CTCCAAGTGCTGATAGAAGAGTG
Cellulose synthase A catalytic subunit 2	Cell wall loosening; cell expansion	AT5G64740	Glyma.08G145600	GTCCATCCAATGCCTTATACC	CACACTTCCATACCCATACAC
